# Supplementary material for: Postdischarge Opioid Use after Total Hip and Total Knee Arthroplasty
Source: PubMed Central journal article supplement — Arthroplast Today. 2021 Jan 30;7:126–9. doi: 10.1016/j.artd.2020.12.021 (PMC7851352; doi:10.1016/j.artd.2020.12.021), 2021-01-30
Supplement: mmc5.pdf [file mmc5.pdf]

# CONFLICT OF INTEREST STATEMENT

## *American Association of Hip and Knee Surgeons*

(Adopted from the American Academy of Orthopaedic Surgeons disclosure statement)

The following form **must be filled out completely and submitted by each author (example, 6 authors, 6 forms).**  
**All items require a response. If there is no relevant disclosure for a given item, enter "None."**

Post-discharge Opioid Use Following Total Hip and Total Knee Arthroplasty  
Manuscript Title

1. Royalties from a company or supplier (The following conflicts were disclosed)  
None
2. Speakers bureau/paid presentations for a company or supplier (The following conflicts were disclosed)  
Hanger Prosthetics one-time lecture
- 3A. Paid employee for a company or supplier (The following conflicts were disclosed)  
None
- 3B. Paid consultant for a company or supplier (The following conflicts were disclosed)  
Zimmer-Biomet
- 3C. Unpaid consultants for a company or supplier (The following conflicts were disclosed)  
None
4. Stock or stock options in a company or supplier (The following conflicts were disclosed)  
None
5. Research support from a company or supplier as a Principal Investigator (The following conflicts were disclosed)  
Funding from Stryker.
6. Other financial or material support from a company or supplier (The following conflicts were disclosed)
7. Royalties, financial or material support from publishers (The following conflicts were disclosed)  
None
8. Medical/Orthopaedic publications editorial/governing board (The following conflicts were disclosed)  
None
9. Board member/committee appointments for a society (The following conflicts were disclosed)  
Research Committee for MSTs

**Each author must sign AND print or type his/her name, date and submit a separate form**

In addition, one BLINDED Conflict of Interest form (no author names used) should be submitted per manuscript with all author disclosures.

Brock A. Lindsey, MD

Author Name (Print or Type)



Author Signature

7/20/20

Date
